# Supplementary material for: Vocal complexity influences female responses to gelada male calls
Source: PubMed Central journal article supplement (PMC4726186; doi:10.1038/srep19680), 2016-01-21
Supplement: srep19680-s1.pdf [file srep19680-s1.pdf]

**Title:** Vocal complexity influences female responses to gelada male calls

**Author Information:** Morgan L. Gustison and Thore J. Bergman

## Supplementary Table 1

**Table S1.** Acoustic parameters for call types used in playback stimuli, reported in mean  $\pm$  SE [range].

| Call type     | N  | Duration (s) <sup>a</sup>            | F1 Frequency (Hz) <sup>b</sup>              | F1 Bandwidth (Hz)                             | F1 Modulation (CV)                     |
|---------------|----|--------------------------------------|---------------------------------------------|-----------------------------------------------|----------------------------------------|
| Exhaled grunt | 94 | 0.324 $\pm$ 0.012<br>[0.136 – 0.766] | 714.168 $\pm$ 8.084<br>[515.224 – 859.491]  | 421.950 $\pm$ 27.350<br>[58.464 – 1202.765]   | 12.988 $\pm$ 0.798<br>[2.336 – 34.448] |
| Inhaled grunt | 30 | 0.470 $\pm$ 0.068<br>[0.101 – 1.430] | 764.651 $\pm$ 24.096<br>[523.135 – 968.694] | 586.732 $\pm$ 67.626<br>[82.359 – 1414.826]   | 16.350 $\pm$ 2.011<br>[2.592 – 47.127] |
| Moan          | 6  | 2.131 $\pm$ 0.274<br>[1.265 – 3.247] | 746.734 $\pm$ 37.475<br>[593.810 – 857.523] | 417.137 $\pm$ 69.587<br>[149.807 – 623.556]   | 9.019 $\pm$ 1.066<br>[5.757 – 12.319]  |
| Wobble        | 6  | 1.129 $\pm$ 0.192<br>[0.507 – 1.680] | 750.921 $\pm$ 38.804<br>[631.204 – 871.575] | 707.137 $\pm$ 193.463<br>[227.722 – 1504.683] | 19.822 $\pm$ 6.110<br>[7.709 – 44.466] |
| Yawn          | 6  | 1.321 $\pm$ 0.166<br>[0.728 – 1.840] | 817.020 $\pm$ 29.881<br>[710.988 – 886.753] | 619.122 $\pm$ 100.842<br>[333.326 – 987.294]  | 14.900 $\pm$ 2.438<br>[8.046 – 22.304] |

<sup>a</sup> Duration calculated with Avisoft SASLab Pro.

<sup>b</sup> The 1<sup>st</sup> formant (F1) was calculated with PRATT using standard settings. Coefficients of variation (CV) were calculated from the listing of all first formant (F1) measures (every 0.00625 s increment) for individual calls. Fundamental frequency (F0) was not included because it could not be determined for all calls.
